1 **Title:** Association of *IRSI* (Gly972Arg) and *IRS2* (Gly1057Asp) genes polymorphisms with OSA and NAFLD in Asian  
2 Indians.

3

4 Author (s): \*Surya Prakash Bhatt, PhD<sup>1</sup>; Randeep Guleria, DM<sup>1</sup>

5 Institute: <sup>1</sup>Department of Pulmonary Medicine and Sleep Disorders, All India Institute of Medical Sciences, New Delhi, India

6

7 *Address for correspondence and reprint request to:*

8

9 \* Dr. Surya Prakash Bhatt

10 Senior Research Scientist

11 Department of Pulmonary Medicine and Sleep Disorders

12 All India Institute of Medical Sciences, New Delhi, India 110029

13 Contact: 011-26593676, E- mail: [suryabhat@gmail.com](mailto:suryabhat@gmail.com)

14

15

16

17

18

19

20

21

22

23

24

25

26

27

28

29

30

31

32

33

34

35

36

37

38 **Abstract**

39

40 Aim and Objective: The aim of the study was to investigate the relationships between insulin receptor substrate (*IRS*) 1  
41 (Gly972Arg) and *IRS2* (Gly1057Asp) genes with obstructive sleep apnea (OSA) and non-alcoholic fatty liver disease  
42 (NAFLD) in Asian Indians.

43

44 Method: A total of 410 overweight/obese subjects (130 with OSA with NAFLD, 100 with OSA without NAFLD, 95 without  
45 OSA and with NAFLD and 85 without OSA and without NAFLD) were recruited. Degree of NAFLD was based on liver  
46 ultrasound and of OSA on overnight polysomnography.

47

48 Result: In *IRS1* gene, the genotype frequency (%) of Arg/Arg was significantly higher in NAFLD and OSA subjects. In  
49 addition, Gly/Arg genotype of *IRS1* gene was associated with significantly higher body mass index, fat mass, %body  
50 fat, triglycerides, cholesterol, alkaline phosphate, aspartate transaminase, fasting insulin and HOMA-IR levels in OSA and  
51 NAFLD subjects. No significant difference in genotype frequencies of *IRS2* was observed between four groups. Further we  
52 found that subjects carrying *IRS1* Gly/Arg (OR 4.49, 95% C.I. 1.06-12.52, p=0.002) genotype possess a much higher risk  
53 of OSA and NAFLD compared to *IRS2* Gly/Asp (OR 1.01, 95% C.I. 0.8-2.56, p=0.05).

54

55 Conclusion: We concluded that Asian Indian subject carrying the allele Gly972Arg polymorphism of *IRS1* is predisposed to  
56 develop OSA and NAFLD.

57

58

59 **Keywords:** Insulin receptor substrate, Obstructive sleep apnea, non alcoholic fatty liver disease, insulin resistance, obesity,  
60 Asian Indians

61

62

63

64

65

66

67

68

69

70

71

72

73

74

75

76  
77  
78  
79  
80  
81  
82  
83  
84  
85  
86  
87  
88  
89  
90  
91  
92  
93  
94  
95  
96  
97  
98  
99  
100  
101  
102  
103  
104  
105  
106  
107  
108  
109  
110  
111  
112  
113

## Introduction

Obstructive sleep apnea (OSA) is a common sleep problem in which complete airway obstruction, caused by pharyngeal collapse during sleeping time. The global prevalence in general populations is 9-38% (1, 2). In Indian studies, the prevalence of OSA is 4.4-13.7% (2, 3). In addition, OSA in Indian males varies from 4.4-19.7% and in females, it is between 2.5- 7.4% from the previous studies (2, 3). The prevalence of OSA also varies depending on the diagnostic criteria used and the age and sex of the population.

Non-alcoholic fatty liver disease (NAFLD) has a broad spectrum from fatty infiltration to severe fibrosis, cirrhosis, and hepatocellular carcinoma. Global prevalence of NAFLD is 25.24% with higher prevalence in the Middle East and South America and lower in Africa (4). In our previous study, we reported that the prevalence of NAFLD is 24.5-32.2% (5) and the primary risk factors for NAFLD are obesity, type 2 diabetes mellitus (T2DM), dyslipidemia, and insulin resistance.

Clinical finding showed that OSA has been associated with NAFLD. Recent metanalysis has been reported that OSA was independently associated with NAFLD in terms of liver enzymes and histological alterations (6). OSA causes accumulation of fatty acids in the liver as a result of nocturnal hypoxia, insulin resistance, metabolic syndrome, dyslipidemia, hypertension, oxidative stress and systemic inflammation. Another study has been indicated that nocturnal hypoxia causes NAFLD development and progression (7). However, nocturnal hypoxia is correlated with development and progression of NAFLD in OSA patients.

Insulin receptor is a hetero tetramer consisting of alpha ( $\alpha$ ) and beta ( $\beta$ ) dimers. The  $\alpha$ -subunit consisting of the ligand-binding site, while the  $\beta$ -subunit consists of a ligand-activated tyrosine kinase. On ligand binding, when tyrosine is phosphorylated, the insulin receptor gets converted into two intracellular substrates, insulin receptor substrate (IRS)-1 and insulin receptor substrate (IRS)-2. The gene for *IRS1* is located on chromosome 2q36 and encodes a 1,242-amino acid protein. The most common polymorphism in the *IRS-1* gene (Gly972Arg), was reported to be associated with OSA (8) and NAFLD (9). The *IRS2* gene is located on chromosome 13q34 and encodes a protein of 1,354 amino acids. Moreover, the common polymorphism Gly1057Asp in the *IRS2* gene has also been reported to influence the susceptibility to insulin resistance and T2DM in polycystic ovary syndrome women (10). Till date, no studies have been investigated the association of *IRS1* and *IRS2* gene with OSA and NAFLD in Asian Indians.

We hypothesized that the *IRS1* (Gly972Arg) and *IRS2* (Gly1057Asp) genes may influence insulin resistance and are associated with risk of OSA and NAFLD in overweight non-diabetic Asian Indians. The aim of the present study was to investigate the relationships between *IRS1* and *IRS2* gene polymorphisms with OSA and NAFLD in Asian Indians.

114

## 115 **Methodology**

116

## 117 **Subjects**

118

119 A total of 410 overweight/ obese subjects [body mass index (BMI>23kg/m<sup>2</sup>)] with age from 20 to 60 years were evaluated  
120 from Outpatients Department of Pulmonary Medicine and Sleep Disorders Clinic at All India Institute of Medical Sciences  
121 (AIIMS), New Delhi, India between July 2012 to July 2017. Out of 410 subjects, 130 with OSA with NAFLD (group 1), 100  
122 with OSA without NAFLD (group 2), 95 without OSA and with NAFLD (group 3) and 85 without OSA and without NAFLD  
123 (group 4) subjects have been recruited. The study was approved by the Institutional Ethics Committee of AIIMS, New Delhi,  
124 India. All experiments were performed in accordance with relevant guidelines and regulations. Written informed consent  
125 was obtained from all participants. Subjects with known T2DM, cardiovascular disease, other liver diseases, severe chronic  
126 obstructive pulmonary disease/ advanced lung disease with mechanical upper airway obstruction, severe organ damage, human  
127 immunodeficiency virus infection, pregnancy, and lactation, or with any pro-inflammatory state were excluded from the study.

128

## 129 **Clinical, anthropometric and biochemical investigations**

130

131 Blood pressure was measured over the right arm in sitting position after five-minute rest. Measurement of weight, height, body  
132 mass index, waist circumference (WC), hip circumference (HC), mid-thigh circumference (MTC) and skinfold thickness at 6  
133 sites (triceps, biceps, anterior axillary, supriliac, subscapular and lateral thoracic) were measured according to the methods  
134 adopted in the previous study (11). Determinations for fasting blood sugar (FBS), total cholesterol (TC), serum triglycerides  
135 (TG), high-density lipoprotein cholesterol (HDL-C), low-density lipoprotein cholesterol (LDL-C), aspartate aminotransferase  
136 (AST) and alanine aminotransferase (ALT) levels were done as previously described (12). Fasting insulin levels  
137 were measured by chemiluminescence (inter-assay CV 4.3%) using a Siemens Immulite 2000 (Siemens  
138 Healthcare). Hyperinsulinemia was defined by values in the highest quartile (13). The value of Homoeostasis Model  
139 Assessment of insulin resistance (HOMA-IR) was calculated as: fasting insulin (IU/ml) × fasting glucose (mmol/l)/22.5 (14).

140

## 141 **Ultrasound imaging**

142

143 All subjects were assessed by a liver ultrasound using 3.5MHz curvilinear probe (Siemens-G 60 S 2004, Germany). For this  
144 entire study ultrasound was done by a single radiologist. The definition of fatty liver was based on a comparative assessment of  
145 image brightness relative to the kidneys, in line with previously reported diagnostic criteria (15).

146

## 147 **Overnight Polysomnography**

148

149 All patients were called for the sleep study at 8.00 pm and were attached to Alice 3 infant and adult computerized  
150 polysomnography (PSG) system using the various leads and devices through standard gold cup electrodes (16). Overnight  
151 PSG was recorded according to standard protocols (17). Diagnosis of OSA was made on the basis of international

152 classification of sleep disorders (ASDA diagnostic classification steering committee). Breathing event was defined according  
153 to the commonly used clinical criteria published by American Academy of Sleep Medicine Task Force (16). PSG was  
154 conducted in a single sleep laboratory and analysis was done by a single expert.

155

### 156 ***Genetic Investigations***

157

158 Genomic deoxyribonucleic acid (DNA) was extracted from whole blood using the QIAamp DNA extraction kit (Qiagen,  
159 Hilden, Germany) and stored at -20°C for the further experiments. The mean concentration of the samples was 80 to 90  
160 ng/mL. Genotyping was performed by polymerase chain reaction-restriction fragment length polymorphism (PCR-RFLP). Its  
161 concentration and quality were then measured in a Nanodrop (Thermo Scientific, Waltham, MA, USA). DNA amplification  
162 and RFLP of the *IRS1* (Gly972Arg) and *IRS2* (Gly1057Asp) genes were performed by previously reported studies (18, 19). In  
163 this study, 60 samples has been confirmed for each polymorphism using DNA sequencing analysis.

164

### 165 **Statistical Analysis**

166

167 Data was entered in an Excel spreadsheet (Microsoft Corp, Washington, USA). The distribution of clinical, biochemical,  
168 anthropometric and body composition parameters were confirmed to approximate normality. Categorical data was analyzed by  
169 Chi-squared test, with Fisher correction when appropriate, and expressed as absolute number (%). Continuous variables were  
170 expressed as the mean  $\pm$  standard deviation to summarize the variables. All continuous values were performed using the Z  
171 score method. The influence of the groups (1vs2, 1 vs3, 1vs 4, 2vs3 and 2vs4) was estimated by the Analysis of Covariance  
172 (ANCOVA) test with multiple comparisons. Pearson's correlation coefficient and significance of 'r' were used to compare the  
173 inflammatory marker levels and clinical parameters.

174

175 In order to determine if observed allele frequency was in conformity with the expected frequency (Hardy Weinberg  
176 equilibrium), chi-square analysis was done. Between-group differences in proportions of alleles or genotypes were compared  
177 using Chi-square test and a two-tailed Fisher's exact test. The influence of the genotype on the clinical biochemical,  
178 anthropometric and body composition parameters was estimated by ANOVA. Logistic regression analyses were carried out to  
179 identify the differences in genotypic frequencies and interaction of two SNPs between the groups. Bonferroni corrections for  
180 multiple comparisons were performed. The odds ratio (OR) and 95% confidence interval were used as a measure of strength  
181 for the association between *IRS1* (Gly972Arg) and *IRS2* (Gly1057Asp) genotypic combinations with the disease. A p-value  
182 <0.05 was considered as significant.

183

## 184 **Results**

185

### 186 ***Clinical, body composition, anthropometry and biochemical profiles***

187

188 Clinical, body composition, anthropometry and biochemical profiles and detailed multi variable comparison (group 1vs2, 1  
189 vs3, 1vs 4, 2vs3, 2vs4 and 3vs4) are presented in table 1, 2 and 3. It was observed that the mean values of blood pressure

190 (systolic and diastolic) ( $p < 0.05$ ), BMI ( $p = 0.003$ ), fat mass ( $p = 0.02$ ), fat-free mass ( $p = 0.002$ ) and %body fat ( $p = 0.002$ ) was  
191 significantly higher in OSA with NAFLD group as compared to other groups.

192 Mean values of WC ( $p = 0.001$ ), HC ( $p = 0.003$ ), MTC ( $p = 0.005$ ), neck circumference ( $p = 0.0004$ ), suprailiac ( $p = 0.02$ ), lateral  
193 thoracic ( $p = 0.02$ ) and thigh ( $p = 0.05$ ) was significantly higher in OSA with NAFLD group as compared to other groups.

194  
195 The values of FBS ( $p = 0.004$ ), serum TG ( $p = 0.02$ ), TC ( $p = 0.02$ ), HDL ( $p = 0.005$ ), LDL ( $p = 0.002$ ), AST ( $p = 0.01$ ), ALT  
196 ( $p = 0.03$ ), ALP ( $p = 0.05$ ), fasting Insulin ( $p = 0.001$ ) and HOMA-IR ( $p = 0.001$ ) were significantly increased in OSA with NAFLD  
197 group.

198

### 199 ***Genotype distribution of IRS1 (Gly972Arg) and IRS2 (Gly1057Asp) genes***

200

201 The group wise genotypic frequencies of *IRS1* (Gly972Arg) SNP are presented in table 4. Overall, 78.75% of subjects  
202 were *Gly/Gly* homozygous, 15.83% were Gly/Arg heterozygous, and 5.42% were Arg/Arg homozygous. Higher frequency  
203 of Arg/Arg genotype of *IRS1* gene was obtained in OSA and NAFLD ( $p = 0.05$ ). The deviation from Hardy-Weinberg  
204 equilibrium among OSA and NAFLD patients for *IRS1* (Gly972Arg) ( $p = 0.001$ ) indicated significant association between this  
205 SNP and the presence of OSA and NAFLD. The overall genotypic frequency of *IRS2* (Gly1057Asp) was 86.66% of subjects  
206 were *Gly/Gly* homozygous, 10.42% were Gly/Asp heterozygous, and 2.92% were Asp/Asp homozygous (table  
207 4). The *IRS2* (Gly1057Asp) genotype frequencies did not follow Hardy Weinberg Equilibrium (chi value=10.5).

208

### 209 ***Multivariate logistic regression***

210

211 Multivariate logistic regression analyses showed the carriers of homozygous *IRS1* Arg had an increased risk of OSA and  
212 NAFLD after adjusting for age, body mass index, fat mass, % body fat, FBG, TG, TC, and fasting insulin (OR 4.49, 95% C.I.  
213 1.06-12.52,  $p = 0.002$ ) (Table 4).

### 214 ***Comparision of IRS 1 and IRS-2 genotypes with clinical pheynotypes***

215 Association of *IRS1* and *IRS-2* gene polymorphisms with clinical, body composition, anthropometric and biochemical  
216 parameters is shown in table 5 and 6. In OSA and NAFLD group, BMI, fat mass, % body fat, FBG, serum TG, TC, ALT, AST,  
217 fasting insulin and HOMA-IR levels were significantly increased in Gly/Arg genotype as compared to Gly/Gly genotype  
218 (figure 1). In OSA without NAFLD group, only BMI ( $p = 0.01$ ) was significantly increased in Gly/Arg genotype  
219 (supplementary table 1). In group 3 and group 4, we did not find any significant association between the genotypes. *IRS2* gene  
220 polymorphism did not find any significant association between all the groups (supplementary table 2).

221

### 222 **Discussion**

223

224 This is the first study to investigate the relationships between *IRS1* and *IRS2* gene polymorphisms with OSA and NAFLD in  
225 Asian Indians. In this case control study, we showed that clinical, body composition and metabolic parameters were  
226 significantly higher in OSA and NAFLD subjects. Further, this study indicated that the frequency of Arg allele

227 of Gly972Arg polymorphisms of *IRS1* gene is significantly increased in OSA and NAFLD. Importantly, *IRS1* polymorphism is  
228 significant genetic determinant for insulin resistance and obesity in OSA and NAFLD. Indeed, subjects carrying *IRS1*  
229 (Gly/Arg) have significantly higher risk of OSA and NAFLD.

230  
231 Several cross-sectional studies examined levels of liver enzymes in patients with OSA (19-23). Chin *et al.* (20) reported that  
232 elevated fasting AST levels in OSA patients and correlated with insulin resistance. Another study, Norman *et al.* (21) showed  
233 that ALT and AST levels were directly correlated with the severity of nocturnal hypoxia. Increased levels of ALT, AST and  
234 AP have been indicated in patients with moderate and severe OSA (22). Sing *et al.* (23) found OSA was prevalent in 46% of  
235 patients with higher AST levels. Similarly, the presence of severe OSA (AHI > 50/ minute) is an independent predictor of  
236 elevated liver enzymes (24). Based on these studies, an interesting finding in our study indicates that metabolic and liver  
237 markers are significantly higher in OSA with NAFLD patients.

238  
239 From developed countries, a limited number of studies related to *IRS1* and *IRS2* gene polymorphisms focused on T2DM, OSA  
240 and NAFLD separately, but no study has been investigated the polymorphism in patients with OSA and NAFLD both. Li *et*  
241 *al.* (25) have shown that *IRS1* gene plays an important role in T2DM risk, especially in Asian. It also indicates that *IRS1* gene  
242 polymorphism is associated with T2DM risk in Caucasian. Another study, Dongiovanni *et al.* (9) reported that *IRS1*  
243 (Gly972Arg) polymorphism affects insulin receptor activity and predisposes to liver damage and decreases hepatic insulin  
244 signaling in patients with NAFLD. Li *et al.* (26) recruited 130 patients with  
245 obstructive sleep apnea hypopnea syndrome (OSAHS) and 136 age and gender matched healthy controls. He showed allele  
246 and genotype frequencies of *IRS1* gene showed significant differences between OSAHS and controls in the Chinese Han  
247 population. Our study also showed significant association of the *IRS1* (Gly/Arg) gene with OSA and NAFLD. Further, in a  
248 study from turkey on 972 OSA subjects, the polymorphism of the *IRS1* (Gly/Arg) was associated with the occurrence of OSAS  
249 in male patients, whereas this polymorphism was not related to the severity of OSAS (27), which was inconsistent with our  
250 finding. The discrepancy between our results and the previous result could be attributed to ethnicity, environmental factors and  
251 probably due to larger sample size of our study compared to previous study.

252 Insulin resistance is the key factor in NAFLD and OSA pathophysiology as well as in the progression of the disease. *IRS1* and  
253 *IRS2* are important for the development of NAFLD in the presence of insulin resistance. Insulin resistance signaling is an  
254 exclusively mediated by *IRS1* and *IRS2* in the liver (28). In this context, Mkaem *et al.* (29) suggested that *IRS1* Arg972  
255 alleles are more prevalent in insulin-resistant subjects, and these alleles are also prevalent in overweight/ obese individuals.  
256 Another study reported that the effect of *IRS1* polymorphism on hepatic insulin resistance and he showed decreased hepatic  
257 levels, reflecting reduced insulin signaling activity (30). Interestingly, our study also indicated that *IRS1* polymorphism  
258 is significant genetic determinant for insulin resistance in OSA and NAFLD.

259  
260 In the Pima Indians, the frequency of *IRS2* gene polymorphism is the highest compared to other populations (31). This may be  
261 because of the high prevalence of obesity and T2DM in the population. Additionally, the current research we did not find any  
262 association of *IRS2* gene with OSA and NAFLD patients. We believe that the *IRS2* (Gly1057Asp) polymorphism influence  
263 glucose homeostasis and obesity. A molecular mechanism related to *IRS2* polymorphism is still unknown. Based on these  
264 observations, it seems reasonable to speculate that *IRS-2* variants are not involved in the development of OSA and NAFLD.



265  
266  
267  
268  
269  
270  
271  
272  
273  
274  
275  
276  
277  
278  
279  
280  
281  
282  
283  
284  
285  
286  
287  
288  
289  
290  
291  
292  
293  
294  
295  
296  
297  
298  
299  
300  
301  
302

Limitations of our study include samples are originated from north India. There is also the lack of data on siblings and other ancestral members of the recruited subjects, which could help in determining the effect of population stratification. Another limitation of our study is the lack of biopsy data and other ancestral members of the recruited subjects, which could help in determining expression across populations for the effect of population stratification. Further, although ultrasonography is a practical approach commonly used to detect liver steatosis, it is not the gold standard technique for quantitative liver fat assessment. Further, ultrasonography is the most common procedure for diagnosis of NAFLD in clinical practice and has a fair sensitivity (87%) and specificity (94%) in detecting hepatic steatosis (32). It is simple to perform, non-invasive, cost-effective and does not entail any radiation hazard, and could also be used in the epidemiological studies.

### Conclusion

Genetic factors may predispose to OSA and NAFLD. We observed significant association of the *IRS1* (Gly/Arg) gene with OSA and NAFLD, whereas *IRS2* (Gly1057Asp) polymorphism is not related to the severity of OSA and NAFLD. Further, *IRS1* polymorphism is a significant genetic determinant for insulin resistance in OSA and NAFLD.

**Abbreviations:** OSA, Obstructive sleep apnea; NAFLD, non alcoholic fatty liver disease; T2DM, type 2 diabetes mellitus; CVD, cardio vascular disease; WC, waist circumference; HC, hip circumference; MTC, mid thigh circumference; FBG, fasting blood glucose; TC, total cholesterol; TG, triglycerides; HDL-C, high-density lipoprotein cholesterol; LDL-C, low-density lipoprotein cholesterol; AST, aspartate aminotransferase; ALT, alanine aminotransferase ; HOMA, homoeostasis modal assessment; PSG, polysomnography; AHI, *apnea-hypopnea index*.

**Conflict of interest:** None of the authors have any conflicts to disclose.

**Financial Disclosure:** This work was supported by a grant from the Ministry of Science and Technology, Department of Science and Technology (Ref: SR/SO/HS-0146/2010), Government of India. The funding agency had no role in study design, data collection, and analysis, decision to publish, or preparation of the manuscript.

**Acknowledgements:** The authors acknowledge the contribution of Mr Kirti Pratap who performed many of the biochemical investigations. Finally, the cooperation of the subjects who took part in the study is greatly appreciated.

Author Contribution: Bhatt SP; Data collection, anthropometry, biochemical, data analysis and wrote the manuscript and edited the manuscript. Guleria R; Investigator and contributed to the discussion.



303 **References**

304

- 305 1. Tufik S, R Santos-Silva, JA Taddei, LRA Bittencourt. 2010. Obstructive sleep apnea syndrome in the Sao Paulo  
306 epidemiologic sleep study. *Sleep Med*,11(5): 441e6.
- 307 2. Reddy EV, T Kadiravan, HK Mishra, V Sreenivas, KK Handa, S Sinha, et al. 2009. Prevalence and risk factors  
308 of obstructive sleep apnea among middle-aged urban Indians: a community-based study. *Sleep Med*, 10(8): 913e8.
- 309 3. Sharma SK, G Ahluwalia. 2010. Epidemiology of adult obstructive sleep apnea syndrome in India. *Indian J Med Res*. 131:  
310 171-5.
- 311 4. Younossi ZM, AB Koenig, D Abdelatif, Y Fazel, L Henry, M Wymer. 2016. Global epidemiology of nonalcoholic fatty  
312 liver disease-Meta-analytic assessment of prevalence, incidence, and outcomes. *Hepatology*. 64(1): 73-84.
- 313 5. Bajaj S, A Nigam, A Luthra, RM Pandey, D Kondal, SP Bhatt, et al. 2009. A case-control study on insulin resistance,  
314 metabolic co-variates & prediction score in non-alcoholic fatty liver disease. *Indian J Med Res*. 129:285-92
- 315 6. Jin S, Jiang S, Hu A. Association between obstructive sleep apnea and non-alcoholic fatty liver disease: a systematic  
316 review and meta-analysis. *Sleep Breath*. 2018. Jan 15. doi: 10.1007/s11325-018-1625-7.
- 317 7. Mirrakhimov AE, VY Polotsky. 2012. Obstructive sleep apnea, and non-alcoholic Fatty liver disease: is the liver another  
318 target? *Front Neurol*. 17; 3(): 149.
- 319 8. Bayazit YA, ME Erdal, M Yilmaz, TU Ciftci, F Soyleme Z, T Gokdoğan, O Kokturk, YK Kemaloglu, A Koybasioglu.  
320 2006. Insulin receptor substrate gene polymorphism is associated with obstructive sleep apnea syndrome in men.  
321 *Laryngoscope*. 116(11): 1962-5.
- 322 9. Dongiovanni P, L Valenti, R Rametta, AK Daly, V Nobili, E Mozzi, et al. 2010. Genetic variants regulating insulin  
323 receptor signalling are associated with the severity of liver damage in patients with non-alcoholic fatty liver  
324 disease. *Gut*. 59(2): 267
- 325 10. Villuendas G, JI Botella-Carretero, B Roldán, J Sancho, HF Escobar-Morreale, JL San Millán. 2005. Polymorphisms in  
326 the insulin receptor substrate-1 (IRS-1) gene and the insulin receptor substrate-2 (IRS-2) gene influence glucose  
327 homeostasis and body mass index in women with polycystic ovary syndrome and non-hyperandrogenic controls. *Hum*  
328 *Reprod*. 20(11): 3184-91
- 329 11. Dudeja V, A Misra, RM Pandey, et al. 2001. BMI does not accurately predict overweight in Asian Indians in Northern  
330 India. *Br J Nutr*. 86: 105-112.
- 331 12. Bhatt SP, P Nigam, A Misra, R Guleria. 2013. Independent associations of low 25 hydroxy vitamin D and high  
332 parathyroid hormonal levels with non alcoholic fatty liver disease in Asian Indians residing in north  
333 India. *Atherosclerosis*, 230(1): 157-63.
- 334 13. Lambert M, G Paradis, J O'Loughlin, EE Delvin, JA Hanley, E Levy. 2004. Insulin resistance syndrome in a  
335 representative sample of children and adolescents from Quebec, Canada. *Int J Obes Relat Metab Disord*, 28: 833-841.
- 336 14. Matthews DR, JP Hosker, AS Rudenski, et al. 1985. Homeostasis model assessment: insulin resistance and beta-cell  
337 function from fasting plasma glucose and insulin concentrations in man. *Diabetologia*. 28: 412-419.
- 338 15. Tam KM, JS Wu. 1986. Ultrasonographic diagnosis of fatty liver. *Taiwan Yi Xue Hui Za Zhi*. 85:45-53.
- 339 16. BaHammam AS, A Obeidat, K Barataman, SA Bahammam, AH Olaish, MM Sharif. 2014. A comparison between the  
340 AASM 2012 and 2007 definitions for detecting hypopnea. *Sleep Breath*. 18(4): 767-73.

- 341 17. Bhushan B, R Guleria, A Misra, RM Pandey, K Luthra, NK Vikram. 2009. Obstructive sleep apnoea correlates with C-  
342 reactive protein in obese Asian Indians. *Nutr Metab Cardiovasc Dis.* 19:184–9.
- 343 18. Shih-Hung Chan, Chen Jyh-Hong, Li Yi-Heng, and Tsai Liang-Miin. 2012. Gly1057Asp polymorphism of insulin  
344 receptor substrate-2 is associated with coronary artery disease in the Taiwanese population. *J Biomed Sci.* 19(1): 100.
- 345 19. Hilal Arikoglu, Hepdogru Aksoy Melda, K.E. Dudu, Asik Aycan, Ipekci Hilmi Suleyman, and Iscioglu Funda. 2014.  
346 IRS1 gene polymorphisms Gly972Arg and Ala513Pro are not associated with insulin resistance and type 2 diabetes risk in  
347 non-obese Turkish population. *Meta Gene.* 2014; 2: 579–585.
- 348 20. Chin, K., T. Nakamura, K. Takahashi, K. Sumi, Y. Ogawa, H. Masuzaki et al. 2003. Effects of obstructive sleep apnea  
349 syndrome on serum aminotransferase levels in obese patients. *Am. J. Med.* 114, 370–376.
- 350 21. Norman, D., A W Bardwell, F. Arosemena, R. Nelesen, J P Mills, S. J Loreda et al. 2008. Serum aminotransferase levels  
351 are associated with markers of hypoxia in patients with obstructive sleep apnea. *Sleep,* 31. 121–126.
- 352 22. Shpirer, I. L. Copel, E. Broide, and A Elizur. 2010. Continuous positive airway pressure improves sleep apnea associated  
353 fatty liver. *Lung.* 188, 301–307.
- 354 23. Singh, H., R. Pollock, J. Uhanova, M. Kryger, K. Hawkins, and G. Y Minuk. 2005. Symptoms of obstructive sleep apnea  
355 in patients with nonalcoholic fatty liver disease. *Dig. Dis. Sci.* 50, 2338–2343.
- 356 24. Tanne, F., F Gagnadoux, O. Chazouilleres, B. Fleury,, D Wendum., E Lasnier., et al. 2005. Chronic liver injury during  
357 obstructive sleep apnea. *Hepatology.* 41, 1290–1296.
- 358 25. Li Q, Y Qiao, C Wang, G Zhang, X, Xu L Zhang. 2016. Associations between two single-nucleotide polymorphisms  
359 (rs1801278 and rs2943641) of insulin receptor substrate 1 gene and type 2 diabetes susceptibility: a meta-analysis.  
360 *Endocrine.* 51(1): 52-62.
- 361 26. Li Z, Tang T, Du J, Wu W, Zhou X, Qin G. 2016. Association between Single Nucleotide Polymorphisms in Gamma  
362 Aminobutyric Acid B Receptor, Insulin Receptor Substrate-1,  
363 and Hypocretin Neuropeptide Precursor Genes and Susceptibility to Obstructive Sleep Apnea Hypopnea Syndrome in  
364 a Chinese Han Population. *Med Princ Pract.* 25(6):517-524.
- 365 27. Bayazit YA, Yilmaz M, Kokturk O, et al. 2007. Association of GABA(B)R1 receptor gene polymorphism with obstructive  
366 sleep apnea syndrome. *ORL J Otorhinolaryngol Relat Spec.* 69:190–197.
- 367 28. Kubota, N. et al. 2008. Dynamic functional relay between insulin receptor substrate 1 and 2 in hepatic insulin  
368 signalling during fasting and feeding. *Cell Metab.* 8, 49–64.
- 369 29. Mkadem SA, C Lautier, F Macari, N Molinari, P Lefebvre, E Renard, et al. 2001. Role of allelic variants Gly972Arg of  
370 IRS-1 and Gly1057Asp of IRS-2 in moderate-to-severe insulin resistance of women with polycystic ovary syndrome.  
371 *Diabetes.* 50, 2164–2168.
- 372 30. Valenti L, R Rametta, P Dongiovanni, et al. 2008. Increased expression and activity of the transcription factor FOXO1 in  
373 nonalcoholic steatohepatitis. *Diabetes ;*57:1355e62
- 374 31. Fritsche A, A Madaus, W Renn, O Tschritter, A Teigeler, M Weisser, et al. 2001. The prevalent Gly1057Asp  
375 polymorphism in the insulin receptor substrate-2 gene is not associated with impaired insulin secretion. *J Clin Endocrinol*  
376 *Metab.* 86: 4822-4825.

377 32. Mathiesen UL, Franzen LE, Aselius H, Resjo M, Jacobsson L, Foberg U, Fryden A, et al. 2002. Increased liver  
378 echogenicity at ultrasound examination reflects degree of steatosis but not of fibrosis in asymptomatic patients with  
379 mild/moderate abnormalities of liver transaminases. Dig Liver Dis. 34:516-52.

380

381 **Figure legend**

382

383 Figure 1: Association of insulin receptor substrate -1 with clinical, body composition and biochemical parameters in  
384 obstructive sleep apnea and non-alcoholic fatty liver disease subjects. Values are presented in Mead and SD. P  
385 values<0.05 is statistically significant. BMI, body mass index; FFM, fat free mass; FBG, fasting blood glucose; TG,  
386 triglyceride; TC, total cholesterol; ALP, Alkaline phosphate; ALT, alanine transaminase; AST, aspartate  
387 transaminase; HOMA-IR, homoeostasis Model Assessment of insulin resistance.

388

389

390

391

392

393

394

395

396

397

398

399

400

401

402

403

404

405

406

407

408

409

410

411

412

413

414

415

416 Table 1: Clinical and body composition investigations

| Variables                            | OSA with<br>NAFLD (n=130) | OSA without<br>NAFLD (n=100) | Without OSA and<br>with NAFLD (n=95) | Without OSA and<br>without NAFLD (n=85) | Overall<br>P value |
|--------------------------------------|---------------------------|------------------------------|--------------------------------------|-----------------------------------------|--------------------|
| Systolic blood pressure (mmHg)       | 131.4±11.5 <sup>¶</sup>   | 130.2±15.6 <sup>@</sup>      | 126±20.6 <sup>#</sup>                | 120±16.9                                | 0.001              |
| Diastolic blood pressure (mmHg)      | 84.4±14.4 <sup>¶</sup>    | 83.5±13.6 <sup>@</sup>       | 82.2±15.4                            | 80.1±13.6                               | 0.003              |
| Pulse Rate (minutes)                 | 79.7±7.8                  | 79.71±5.9                    | 76.6±5.1                             | 76.83±4.6                               | 0.11               |
| Body mass index (Kg/m <sup>2</sup> ) | 33.3±7.9 <sup>¶</sup>     | 32.5±6.9 <sup>@</sup>        | 31.0±8.3 <sup>#</sup>                | 28.5±8.6                                | 0.003              |
| Fat mass (kg)                        | 40.45±17.4 <sup>*</sup>   | 35.6±14.2                    | 31.1±14                              | 30.5±9.5                                | 0.02               |
| Fat free mass (kg)                   | 54.1±12.1 <sup>*</sup>    | 52.4±11.7 <sup>@</sup>       | 48.03±12.1                           | 45.7±9.7                                | 0.002              |
| Total body water (kg)                | 40.6±8.6                  | 38.2±9.6                     | 35.2±8.7                             | 33.2±8.3                                | 0.5                |
| Body fat (%)                         | 40.2±13.6 <sup>¶ †</sup>  | 38.2±11.6 <sup>@</sup>       | 37.1±12.8 <sup>#</sup>               | 34.6±11.6                               | 0.002              |

417

418 Results are shown as mean± SD. P value ≤0.05 is statistically significant. \*Group 1 vs 2, 1 vs 3 and 1 vs 4 (p≤0.05); #  
 419 group 3 vs 4 (p≤0.05); @ group 2 vs 4 (p≤0.05); ¶ group 1 vs 4 (p≤0.05); ‡group 2 vs 3 (p≤0.05); † group 1 vs 3  
 420 (p≤0.05).

421

422

423

424

425

426

427

428

429

430

431

432

433

434

435

436

437

438

439

440

441

442

443 Table 2. Anthropometry Parameters

444

| Variables                      | OSA with NAFLD (n=130)  | OSA without NAFLD (n=100) | Without OSA and with NAFLD (n=95) | Without OSA and without NAFLD (n=85) | Overall P value |
|--------------------------------|-------------------------|---------------------------|-----------------------------------|--------------------------------------|-----------------|
| <b>Circumferences (cm)</b>     |                         |                           |                                   |                                      |                 |
| Waist                          | 106.9±13.3 <sup>‡</sup> | 104.2±14.6 <sup>@</sup>   | 102±13.5                          | 100±15.6                             | 0.001           |
| Hip                            | 109.5±13.2 <sup>*</sup> | 106.5±23.5 <sup>@</sup>   | 103±16.9 <sup>#</sup>             | 101.7±15.9                           | 0.003           |
| Mid thigh                      | 55.8±7.4 <sup>¶</sup>   | 54.1±8.6                  | 53.2±8.9                          | 52±7.9                               | 0.005           |
| Mid Arm                        | 32.16±7.6 <sup>¶</sup>  | 30±6.5                    | 29.7±6.4                          | 24.6±5.6                             | 0.6             |
| Neck                           | 38.74±5.6 <sup>¶</sup>  | 38.3±3.6                  | 36.2±4.04                         | 32.1±3.1                             | 0.0004          |
| <b>Skinfold thickness (mm)</b> |                         |                           |                                   |                                      |                 |
| Biceps                         | 16.8±7.07               | 15.4±6.7                  | 17.36±5.4                         | 15.2±5.5                             | 0.9             |
| Triceps                        | 25.0±10.5               | 24.3±9.3                  | 24.3±7.7                          | 22.2±9.3                             | 0.44            |
| Subscapular                    | 30±8.1                  | 29.2±9.8                  | 27±5.6                            | 26±6.5                               | 0.2             |
| Antaxillary                    | 17±6.0                  | 14.6±5.3                  | 13.27±5.2                         | 13.7±5.1                             | 0.5             |
| Suprailiac                     | 31.8±9.8 <sup>*</sup>   | 29.2±10.5                 | 28.1±9.5                          | 27±8.9                               | 0.02            |
| Lateral thoracic               | 33.7±11.1 <sup>¶</sup>  | 31.9±12.5                 | 30.1±11.9                         | 28.9±9.8                             | 0.02            |
| Thigh                          | 30.1±11.3 <sup>‡</sup>  | 26±9.9                    | 25.4±6.6                          | 24.7±8.1                             | 0.05            |

445

446 Results are shown as mean± SD. P value ≤0.05 is statistically significant. \*Group 1 vs 2, 1vs 3 and 1 vs 4

447 (p≤0.05); ¶ group 1 vs 4 (p≤0.05); ‡ group 1 vs 3 (p≤0.05); @ group 2 vs 4 (p≤0.05); # group 3 vs 4

448 (p≤0.05).

449

450

451

452

453

454

455

456

457

458

459

460

461

462

463

464 Table 3: Biochemical Investigations

465

| Variables                        | OSA with<br>NAFLD (n=130)  | OSA without<br>NAFLD (n=100) | Without OSA with<br>NAFLD (n=95) | Without OSA and<br>without NAFLD (n=85) | Overall<br>P value |
|----------------------------------|----------------------------|------------------------------|----------------------------------|-----------------------------------------|--------------------|
| Fasting Blood Glucose (mg/dl)    | 103±25.2 <sup>¶, †</sup>   | 104.1±38.4 <sup>‡</sup>      | 98.14±21.2                       | 90.3±24.4                               | 0.004              |
| Serum Triglycerides (mg/dl)      | 189±40.6 <sup>*</sup>      | 177±46.9 <sup>@</sup>        | 158.1±55.2 <sup>#</sup>          | 151±58.9                                | 0.01               |
| Total Cholesterol (mg/dl)        | 185±38.3 <sup>*</sup>      | 180±44.6 <sup>@</sup>        | 178±43.6 <sup>#</sup>            | 171±39.8                                | 0.02               |
| High density lipoprotein (mg/dl) | 42.4±8.3 <sup>¶</sup>      | 43.8±11.7                    | 44.6±9.1 <sup>#</sup>            | 52.3±10.2                               | 0.005              |
| Low density lipoprotein          | 112.6±40.2 <sup>¶</sup>    | 109±36.5 <sup>@</sup>        | 109±35.6 <sup>#</sup>            | 98±30.8                                 | 0.002              |
| Very low density lipoprotein     | 33.5±11.2                  | 32±12.3                      | 31±11.3                          | 30.0±9.6                                | 0.4                |
| Aspartate transaminase (IU/L)    | 44.5±15.9 <sup>¶, †</sup>  | 41.4±22.1 <sup>‡</sup>       | 39.6±19.6 <sup>#</sup>           | 31.6±15.9                               | 0.01               |
| Alanine transaminase (IU/L)      | 60.9±10.3 <sup>*</sup>     | 54.2±12.9 <sup>@</sup>       | 52.3±11.9                        | 50.9±10.9                               | 0.03               |
| Alkaline phosphate (IU/L)        | 240.6±74.3 <sup>¶, †</sup> | 242±76.5                     | 235±72.9                         | 235±69.8                                | 0.05               |
| Fasting Insulin (µU/ml)          | 12±4.3 <sup>*</sup>        | 11.1±4.8 <sup>‡</sup>        | 9.3±3.6                          | 9.3±3.8                                 | 0.001              |
| HOMA-IR                          | 2.9±0.92 <sup>*</sup>      | 2.5±0.98 <sup>@</sup>        | 1.9±0.86                         | 1.6±0.76                                | 0.001              |

466

467 Results are shown as mean± SD. P value ≤0.05 is statistically significant. \*Group 1 vs 2, 1 vs 3 and 1 vs 4 (p≤0.05); †group 2 vs  
468 3 and group 2 vs 4 (p≤0.05); # group 3 vs 4 (p≤0.05); @ group 2 vs 4 (p≤0.05); ¶ group 1 vs 4 (p≤0.05); † group 1 vs 3  
469 (p≤0.05). HOMA-IR, homoeostasis modal assessment for insulin resistance.

470

471

472

473

474

475

476

477

478

479

480 Table 4. Allele distribution of IRS1 and IRS2 genes polymorphisms between the groups.

|                                  | <b>OSA with<br/>NAFLD<br/>(N=130)</b> | <b>OSA without<br/>NAFLD<br/>(N=100)</b> | <b>Without OSA<br/>with NAFLD<br/>(N=95)</b> | <b>Without OSA and<br/>without NAFLD<br/>(N=85)</b> | <b>P<sup>a</sup></b> | <b>Odds ratio<br/>(95% CI)</b> | <b>P<sup>b</sup></b> |       |
|----------------------------------|---------------------------------------|------------------------------------------|----------------------------------------------|-----------------------------------------------------|----------------------|--------------------------------|----------------------|-------|
| <i>IRS1</i> [Gly972Arg, n(%)]    |                                       |                                          |                                              |                                                     |                      |                                |                      |       |
| Allele Gly                       | 112 (86.5)                            | 89 (89)                                  | 86 (90.5)                                    | 79 (93)                                             | 0.04                 | 1 (reference)                  | 0.002                |       |
| Allele Arg                       | 18 (13.5)                             | 11 (11)                                  | 9 (9.5)                                      | 6 (7)                                               |                      | 2.25 (1.41-3.30)               |                      |       |
| Additive model                   |                                       |                                          |                                              |                                                     |                      |                                | 4.04 (1.52-11.51)    | 0.001 |
| <i>IRS2</i> [Gly1057Asp, n ((%)] |                                       |                                          |                                              |                                                     |                      |                                |                      |       |
| Allele Gly                       | 118 (91)                              | 92 (92)                                  | 88 (93)                                      | 82 (96.5)                                           | 0.06                 | 1 (reference)                  | 0.08                 |       |
| Allele Asp                       | 12 (9)                                | 8 (8)                                    | 7 (7)                                        | 3 (3.5)                                             |                      | 0.98 (0.75-1.99)               |                      |       |
| Additive model                   |                                       |                                          |                                              |                                                     |                      |                                | 1.10 ( 0.8-2.56)     | 0.06  |

481

482

483

484

485

486

487

488

489

490

491

492

493

494 Results are shown as n (%). P value  $\leq 0.05$  is statistically significant.

495 <sup>a</sup>P value was computed by the pearson chi-square test

496 <sup>b</sup>Data were calculated by logistic regression after adjusting for age, body mass index, fat mass, % body fat, fasting blood  
497 glucose, serum triglyceride, total cholesterol and fasting insulin.

498

499



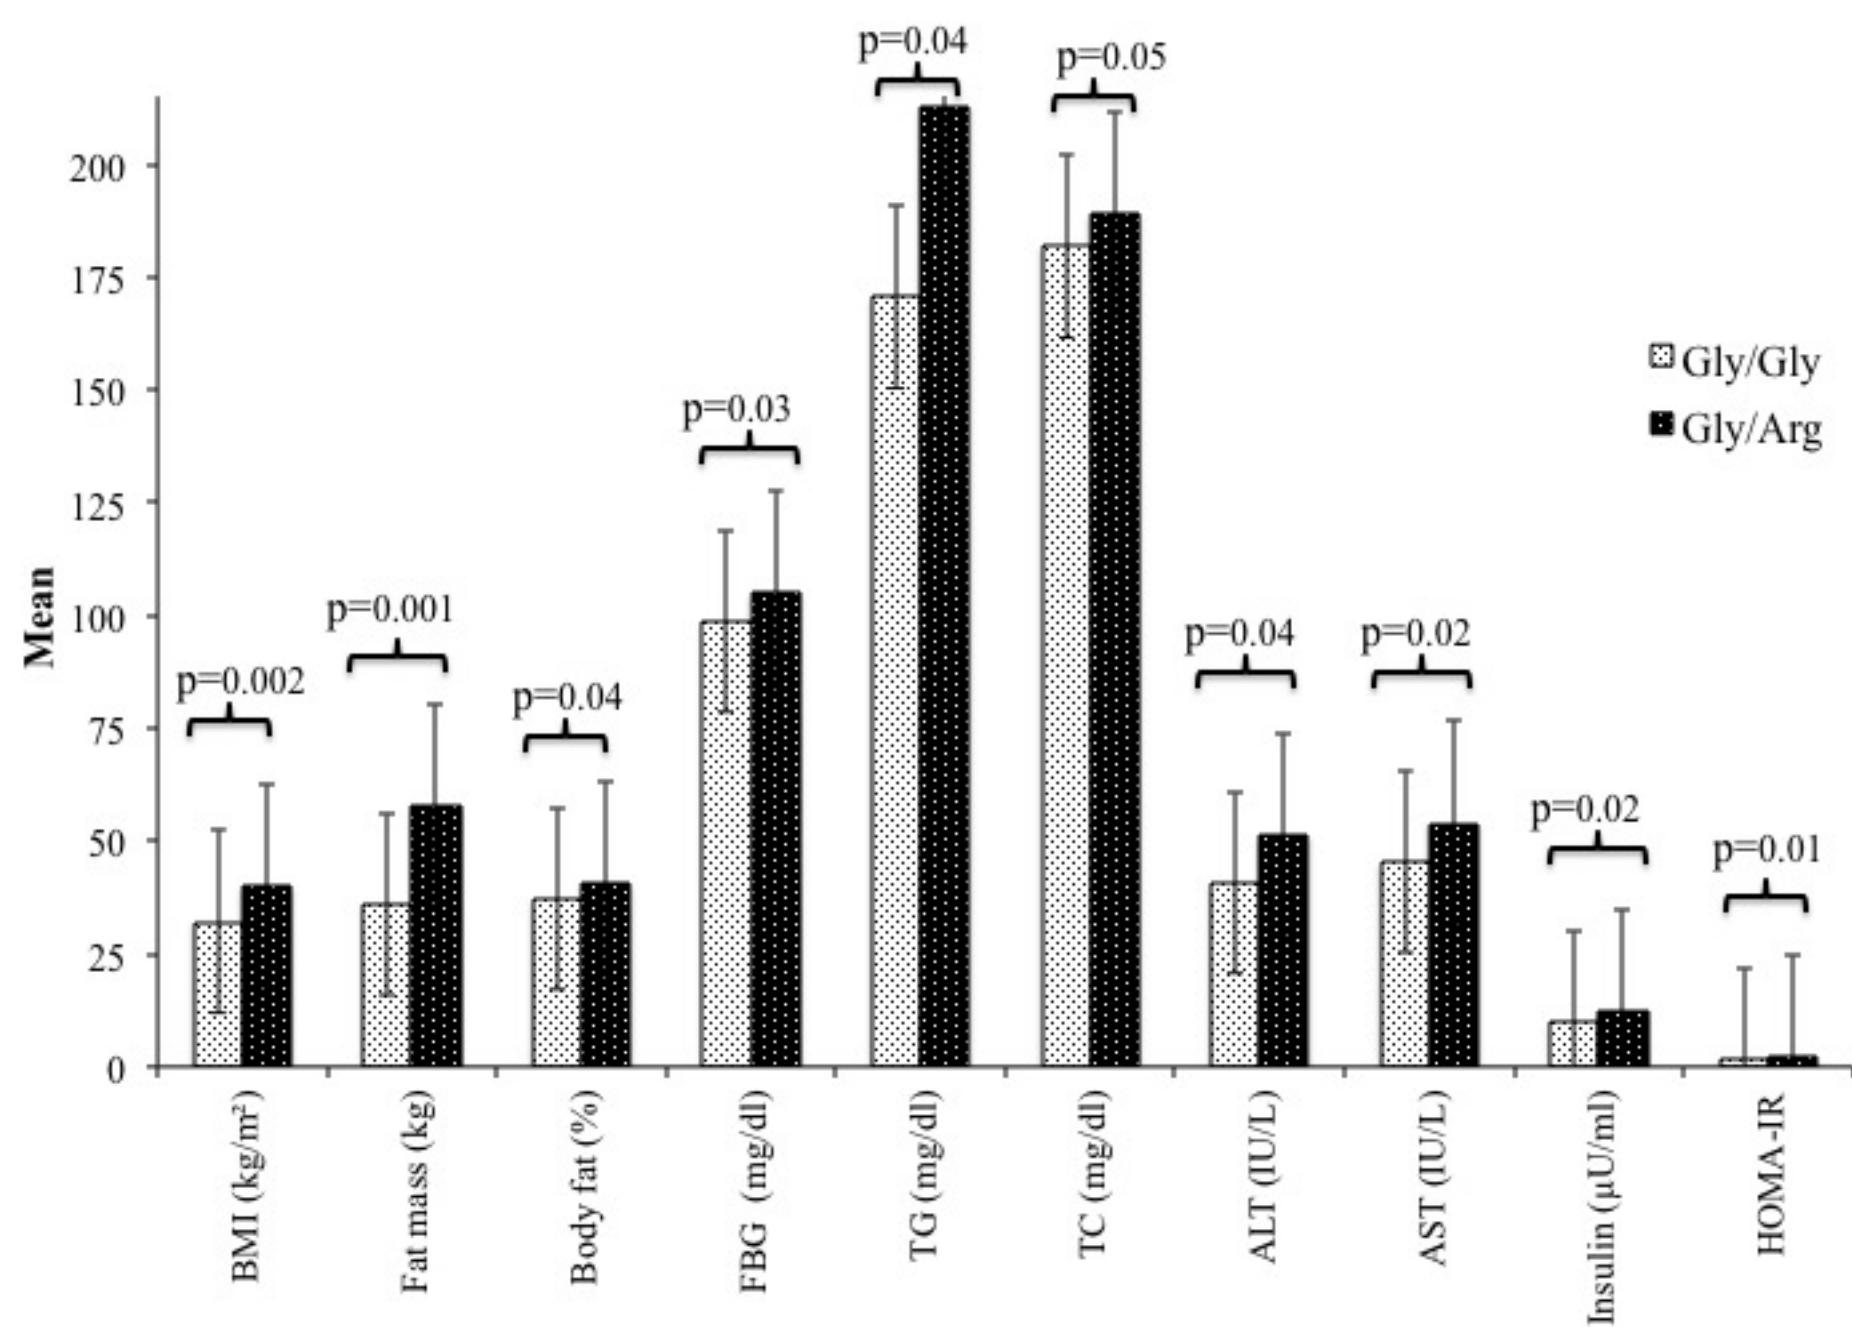

Figure
